# Supplementary material
Source: PubMed Central journal article supplement (PMC6311521)
Supplement: supp_RA118.005395_140119_3_supp_229758_ph8s8n.pdf [file supp_RA118.005395_140119_3_supp_229758_ph8s8n.pdf]

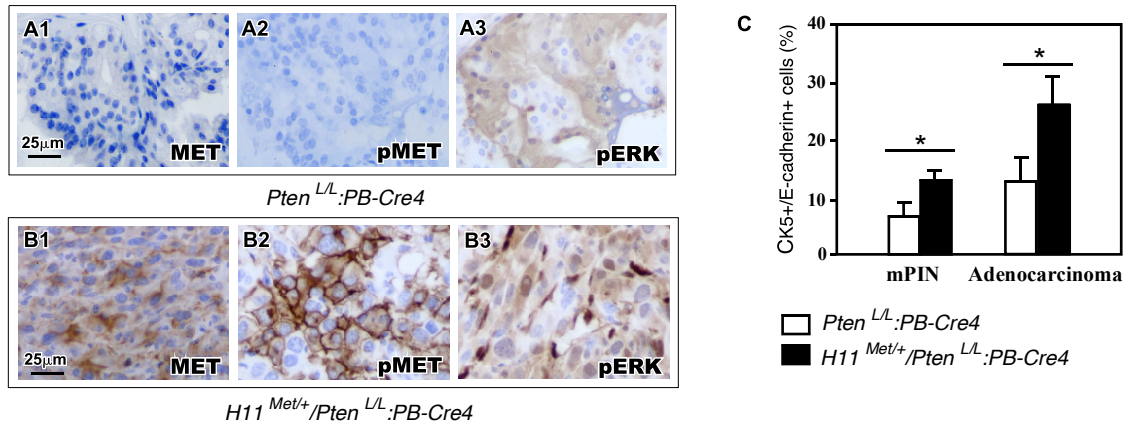

**SI Fig 1. Immunohistochemical analysis of *Pten<sup>L/L</sup>:PB-Cre4* and *H11<sup>Met/+</sup>/Pten<sup>L/L</sup>:PB-Cre4* prostates.** (A-B) The expression and activation of Met evaluated by Met (A1, B1), phosphorylated Met (A2, B2) and phosphorylated ERK (A3, B3) in *Pten<sup>L/L</sup>:PB-Cre4* and *H11<sup>Met/+</sup>/Pten<sup>L/L</sup>:PB-Cre4* prostates. (C) Quantification of CK5 positive cells per 1,000 E-cadherin positive epithelial cells from prostate tissues of *Pten<sup>L/L</sup>:PB-Cre4* and *H11<sup>Met/+</sup>/Pten<sup>L/L</sup>:PB-Cre4* prostates. The graphical bars represent the mean±SD, \*p<0.05.
